# Supplementary material
Source: PubMed Central journal article supplement (PMC8487705)
Supplement: tp-105-2146-s001.pdf [file tp-105-2146-s001.pdf]

## SUPPLEMENTAL DIGITAL CONTENT

**Table S1:** Baseline features, baseline immunosuppression and outcomes of solid organ transplant recipients diagnosed with COVID-19 during 2020 in Spain. Global and according to transplant type.

|                                         | GLOBAL<br>(N=1634) | KIDNEY<br>(N=1063) | LIVER<br>(N=280) | HEART<br>(N=149) | LUNG<br>(N=112) | PANCREAS<br>(N=27) | MULTIVISCERAL<br>(N=3) |
|-----------------------------------------|--------------------|--------------------|------------------|------------------|-----------------|--------------------|------------------------|
| <b>Baseline features</b>                |                    |                    |                  |                  |                 |                    |                        |
| Sex male, n (%)                         | 1075 (65,8%)       | 680 (64,0%)        | 195 (69,6%)      | 111 (74,5%)      | 70 (62,5%)      | 17 (63.0%)         | 2 (66.7%)              |
| Age at diagnosis                        |                    |                    |                  |                  |                 |                    |                        |
| Years, median (IQR)                     | 61 (51-69)         | 60 (50-69)         | 64 (56-71)       | 62 (50-70)       | 61 (55-65)      | 48 (42-53)         | 13 (11-31)             |
| >60 years, n (%)                        | 829 (50.7%)        | 516 (48.5%)        | 172 (61.4%)      | 83 (55.7%)       | 57 (50.9%)      | 1 (3.7%)           | 0 -                    |
| Hospital-acquired COVID-19, n (%)       | 177 (10.9%)        | 112 (10.6%)        | 38 (13.6%)       | 13 (8.7%)        | 10 (8.9%)       | 3 (11.1%)          | 1 (33.3%)              |
| Time since transplantation              |                    |                    |                  |                  |                 |                    |                        |
| Months, median (IQR)                    | 71 (27-145)        | 69 (28-138)        | 80 (29-180)      | 118 (34-186)     | 40 (15-79)      | 101 (38-152)       | 77 (20-104)            |
| Diagnosis within the first month, n (%) | 39 (2.4%)          | 25 (2.4%)          | 7 (2.5%)         | 4 (2.7%)         | 3 (2.7%)        | 0 -                | 0 -                    |
| Diagnosis beyond the first year, n (%)  | 1417 (86.9%)       | 930 (87.6%)        | 241 (86.4%)      | 130 (87.2%)      | 88 (79.3%)      | 25 (92.6%)         | 3 (100.0%)             |
| <b>Baseline immunosuppression</b>       |                    |                    |                  |                  |                 |                    |                        |
|                                         | <b>N=1627</b>      | <b>N=1057</b>      | <b>N=279</b>     | <b>N=149</b>     | <b>N=112</b>    | <b>N=27</b>        | <b>N=3</b>             |
| Corticosteroids, n (%)                  | 1174 (72.2%)       | 876 (82.9%)        | 47 (16.8%)       | 112 (75.2%)      | 110 (98.2%)     | 26 (96.3%)         | 3 (100.0%)             |
| Calcineurin inhibitor, n (%)            | 1468 (90.2%)       | 988 (93.5%)        | 200 (71.7%)      | 138 (92.6%)      | 112 (100.0%)    | 27 (100.0%)        | 3 (100.0%)             |
| Antimetabolite, n (%) <sup>a</sup>      | 1209 (74.3%)       | 816 (77.2%)        | 161 (57.7%)      | 122 (81.9%)      | 85 (75.9%)      | 25 (92.6%)         | 0 -                    |
| mTOR inhibitor, n (%)                   | 299 (18.4%)        | 187 (17.7%)        | 58 (20.8%)       | 25 (16.8%)       | 28 (25.0%)      | 1 (3.7%)           | 0 -                    |
| <b>Outcomes</b>                         |                    |                    |                  |                  |                 |                    |                        |
|                                         | <b>N=1510</b>      | <b>N=955</b>       | <b>N=270</b>     | <b>N=149</b>     | <b>N=112</b>    | <b>N=21</b>        | <b>N=3</b>             |
| Hospital admission, n (%)               | 1061 (70.4%)       | 696 (72.9%)        | 160 (59.5%)      | 97 (65.5%)       | 96 (85.7%)      | 12 (57.1%)         | 0 -                    |
| ICU admission, n (%)                    | 205 (13.8%)        | 145 (15.4%)        | 20 (7.5%)        | 15 (10.3%)       | 23 (20.7%)      | 2 (9.5%)           | 0 -                    |
| Invasive mechanical ventilation, n (%)  | 155 (10.7%)        | 106 (11.5%)        | 14 (5.7%)        | 11 (7.6%)        | 22 (19.8%)      | 2 (9.5%)           | 0 -                    |
| ARDS, n (%)                             | 394 (26,6%)        | 261 (27.7%)        | 46 (18.0%)       | 31 (20.9%)       | 52 (46.8%)      | 4 (19.0%)          | 0 -                    |
| Septic shock, n (%)                     | 106 (7.2%)         | 74 (7.9%)          | 13 (5.1%)        | 7 (4.8%)         | 11 (10.3%)      | 1 (4.8%)           | 0 -                    |
| Multiorgan failure (%)                  | 151 (10.2%)        | 92 (9.8%)          | 25 (9.7%)        | 10 (6.8%)        | 23 (21.3%)      | 1 (4.8%)           | 0 -                    |
| Death, n (%)                            | 311 (20.6%)        | 193 (20.2%)        | 47 (17.4%)       | 25 (16.8%)       | 45 (40.2%)      | 1 (4.8%)           | 0 -                    |

ARDS: Acute Respiratory Distress Syndrome; ICU: Intensive Care Unit

**Table S2.** Baseline features, treatment and outcomes of solid organ transplant recipients diagnosed with COVID-19 during 2020 in Spain who required hospital admission. Global and by period of diagnosis.

|                                         | GLOBAL<br>(N=1,061) | First wave (before<br>13 July, 2020)<br>(N=560) | Second wave (after<br>13 July, 2020)<br>(N=501) | p      |
|-----------------------------------------|---------------------|-------------------------------------------------|-------------------------------------------------|--------|
| <b>Baseline features</b>                |                     |                                                 |                                                 |        |
| Sex male, n (%)                         | 719 (67.8%)         | 381 (68.0%)                                     | 338 (67.5%)                                     | 0.843  |
| Age at diagnosis                        |                     |                                                 |                                                 |        |
| Years, median (IQR)                     | 62 (53-70)          | 63 (54-71)                                      | 62 (52-69)                                      | 0.008  |
| >60 years, n (%)                        | 601 (56.6%)         | 334 (59.6%)                                     | 267 (53.3%)                                     | 0.037  |
| Type of transplant                      |                     |                                                 |                                                 |        |
| Kidney                                  | 696 (65.6%)         | 352 (62.9%)                                     | 344 (68.7%)                                     | 0.364  |
| Liver                                   | 160 (15.1%)         | 90 (16.1%)                                      | 70 (14.0%)                                      |        |
| Heart                                   | 97 (9.1%)           | 56 (10.0%)                                      | 41 (8.2%)                                       |        |
| Lung                                    | 96 (9.0%)           | 56 (10.0%)                                      | 40 (8.0%)                                       |        |
| Pancreas                                | 12 (1.1%)           | 6 (1.1%)                                        | 6 (1.2%)                                        |        |
| Hospital-acquired COVID-19, n (%)       | 143 (13.6%)         | 70 (12.6%)                                      | 73 (14.6%)                                      | 0.334  |
| Time since transplantation              |                     |                                                 |                                                 |        |
| Months, median (IQR)                    | 72 (26-145)         | 73 (26-150)                                     | 70 (26-144)                                     | 0.418  |
| Diagnosis within the first month, n (%) | 31 (2.9%)           | 15 (2.7%)                                       | 16 (3.2%)                                       | 0.626  |
| Diagnosis beyond the first year, n (%)  | 903 (85.3%)         | 481 (86.2%)                                     | 422 (84.2%)                                     | 0.367  |
| <b>Baseline immunosuppression</b>       |                     |                                                 |                                                 |        |
|                                         | <b>N=1057</b>       | <b>N=559</b>                                    | <b>N=498</b>                                    |        |
| Corticosteroids, n (%)                  | 806 (76.3%)         | 410 (73.3%)                                     | 396 (79.5%)                                     | 0.019  |
| Calcineurin inhibitor, n (%)            | 952 (90.1%)         | 489 (87.5%)                                     | 463 (93.0%)                                     | 0.003  |
| Antimetabolite, n (%) <sup>a</sup>      | 790 (74.7%)         | 403 (72.1%)                                     | 387 (77.7%)                                     | 0.036  |
| mTOR inhibitor, n (%)                   | 195 (18.4%)         | 121 (21.6%)                                     | 74 (14.9%)                                      | 0.005  |
| <b>Anti SARS-CoV-2 treatment</b>        |                     |                                                 |                                                 |        |
|                                         | <b>N=1061</b>       | <b>N=560</b>                                    | <b>N=501</b>                                    |        |
| Any treatment, n (%)                    | 567 (53.4%)         | 502 (89.6%)                                     | 65 (13.0%)                                      | <0.001 |
| Hydroxichloroquine, n (%)               | 484 (45.6%)         | 483 (86.3%)                                     | 1 (0.2%)                                        | <0.001 |
| Azithromycin, n (%)                     | 338 (31.9%)         | 314 (56.1%)                                     | 24 (4.8%)                                       | <0.001 |
| Protease inhibitors, n (%)              | 191 (18.0%)         | 190 (33.8%)                                     | 1 (0.2%)                                        | <0.001 |
| Remdesivir, n (%)                       | 46 (4.3%)           | 5 (0.9%)                                        | 41 (8.2%)                                       | <0.001 |
| Other antivirals, n (%) <sup>b</sup>    | 8 (0.8%)            | 4 (0.7%)                                        | 4 (0.8%)                                        | 1.000  |
| Interferon- $\beta$ , n (%)             | 26 (2.5%)           | 26 (4.6%)                                       | 0-                                              | <0.001 |
| <b>Immunomodulatory treatment</b>       |                     |                                                 |                                                 |        |
|                                         | <b>N=1061</b>       | <b>N=560</b>                                    | <b>N=501</b>                                    |        |
| Any treatment, n (%)                    | 670 (63.1%)         | 297 (53.0%)                                     | 373 (74.5%)                                     | <0.001 |
| Corticosteroids, n (%) <sup>c</sup>     | 633 (59.7%)         | 263 (47.0%)                                     | 370 (73.9%)                                     | <0.001 |
| Tocilizumab, n (%)                      | 156 (14.7%)         | 121 (21.6%)                                     | 35 (7.0%)                                       | <0.001 |
| Anakinra, n (%)                         | 17 (1.6%)           | 10 (1.8%)                                       | 7 (1.4%)                                        | 0.615  |
| <b>Outcomes</b>                         |                     |                                                 |                                                 |        |
|                                         | <b>N=1061</b>       | <b>N=560</b>                                    | <b>N=501</b>                                    |        |
| ICU admission, n (%)                    | 205 (19.7%)         | 90 (16.4%)                                      | 115 (23.4%)                                     | 0.004  |
| Invasive mechanical ventilation, n (%)  | 155 (15.5%)         | 64 (12.6%)                                      | 91 (18.6%)                                      | 0.008  |
| ARDS, n (%)                             | 392 (37.7%)         | 215 (39.1%)                                     | 177 (36.0%)                                     | 0.312  |
| Septic shock, n (%)                     | 105 (10.2%)         | 47 (8.6%)                                       | 58 (11.9%)                                      | 0.080  |
| Multiorgan failure (%)                  | 151 (14.6%)         | 68 (12.4%)                                      | 83 (17.0%)                                      | 0.036  |
| Death, n (%)                            | 301 (28.4%)         | 162 (28.9%)                                     | 139 (27.7%)                                     | 0.669  |

<sup>a</sup>Mainly mycophenolate.

<sup>b</sup>Gancyclovir (n=3), ribavirine (n=2), oseltamivir (n=2), raltegravir (n=1).

<sup>c</sup>Includes corticosteroid boluses, initiation of low-to-moderate doses or increase of baseline dose.

ARDS: Acute Respiratory Distress Syndrome, ICU: Intensive Care Unit, IQR: Interquartile range, mTOR: mammalian target of rapamycin.

**Table S3.** Baseline features, treatment and outcomes of solid organ transplant recipients diagnosed with COVID-19 during 2020 in Spain who required ICU admission. Global and by period of diagnosis.

|                                         | GLOBAL<br>(N=205) | First wave (before<br>13 July, 2020)<br>(N=90) | Second wave (after<br>13 July, 2020)<br>(N=115) | p      |
|-----------------------------------------|-------------------|------------------------------------------------|-------------------------------------------------|--------|
| <b>Baseline features</b>                |                   |                                                |                                                 |        |
| Sex male, n (%)                         | 141 (68.8%)       | 58 (64.4%)                                     | 83 (72.2%)                                      | 0.236  |
| Age at diagnosis                        |                   |                                                |                                                 |        |
| Years, median (IQR)                     | 62 (53-67)        | 61 (52-66)                                     | 63 (54-68)                                      | 0.293  |
| >60 years, n (%)                        | 113 (55.1%)       | 48 (53.3%)                                     | 65 (56.5%)                                      | 0.649  |
| Type of transplant                      |                   |                                                |                                                 |        |
| Kidney                                  | 145 (70.7%)       | 64 (71.1%)                                     | 81 (70.4%)                                      | 0.364  |
| Liver                                   | 20 (9.8%)         | 8 (8.9%)                                       | 12 (10.4%)                                      |        |
| Heart                                   | 15 (7.3%)         | 7 (7.8%)                                       | 8 (7.0%)                                        |        |
| Lung                                    | 23 (11.2%)        | 9 (10.0%)                                      | 14 (12.2%)                                      |        |
| Pancreas                                | 2 (1.0%)          | 2 (2.2%)                                       | 0-                                              |        |
| Hospital-acquired COVID-19, n (%)       | 34 (16.7%)        | 15 (17.0%)                                     | 19 (16.5%)                                      | 0.921  |
| Time since transplantation              |                   |                                                |                                                 |        |
| Months, median (IQR)                    | 55 (18-121)       | 55 (20-132)                                    | 60 (17-115)                                     | 0.517  |
| Diagnosis within the first month, n (%) | 11 (5.4%)         | 4 (4.4%)                                       | 7 (6.1%)                                        | 0.759  |
| Diagnosis beyond the first year, n (%)  | 161 (78.5%)       | 74 (82.2%)                                     | 87 (75.7%)                                      | 0.256  |
| <b>Baseline immunosuppression</b>       |                   |                                                |                                                 |        |
|                                         | <b>N=205</b>      | <b>N=90</b>                                    | <b>N=115</b>                                    |        |
| Corticosteroids, n (%)                  | 167 (81.5%)       | 74 (82.2%)                                     | 93 (80.9%)                                      | 0.805  |
| Calcineurin inhibitor, n (%)            | 194 (94.6%)       | 82 (91.1%)                                     | 112 (97.4%)                                     | 0.062  |
| Antimetabolite, n (%) <sup>a</sup>      | 160 (78.0%)       | 67 (74.4%)                                     | 93 (80.9%)                                      | 0.270  |
| mTOR inhibitor, n (%)                   | 30 (14.6%)        | 20 (22.2%)                                     | 10 (8.7%)                                       | 0.007  |
| <b>Anti SARS-CoV-2 treatment</b>        |                   |                                                |                                                 |        |
|                                         | <b>N=205</b>      | <b>N=90</b>                                    | <b>N=115</b>                                    |        |
| Any treatment, n (%)                    | 99 (48.3%)        | 82 (91.1%)                                     | 17 (14.8%)                                      | <0.001 |
| Hydroxychloroquine, n (%)               | 77 (37.6%)        | 76 (84.4%)                                     | 1 (0.9%)                                        | <0.001 |
| Azithromycin, n (%)                     | 61 (29.8%)        | 57 (63.3%)                                     | 4 (3.5%)                                        | <0.001 |
| Protease inhibitors, n (%)              | 48 (23.4%)        | 48 (53.3%)                                     | 0-                                              | <0.001 |
| Remdesivir, n (%)                       | 14 (6.8%)         | 2 (2.2%)                                       | 12 (10.4%)                                      | 0.021  |
| Other antivirals, n (%) <sup>b</sup>    | 4 (2.0%)          | 2 (2.2%)                                       | 2 (1.7%)                                        | 1.000  |
| Interferon- $\beta$ , n (%)             | 12 (5.9%)         | 12 (13.3%)                                     | 0-                                              | <0.001 |
| <b>Immunomodulatory treatment</b>       |                   |                                                |                                                 |        |
|                                         | <b>N=205</b>      | <b>N=90</b>                                    | <b>N=115</b>                                    |        |
| Any treatment, n (%)                    | 169 (82.4%)       | 61 (67.8%)                                     | 108 (93.9%)                                     | <0.001 |
| Corticosteroids, n (%) <sup>c</sup>     | 156 (76.1%)       | 50 (55.6%)                                     | 106 (92.2%)                                     | <0.001 |
| Tocilizumab, n (%)                      | 60 (29.3%)        | 39 (43.3%)                                     | 21 (18.3%)                                      | <0.001 |
| Anakinra, n (%)                         | 6 (2.9%)          | 3 (3.3%)                                       | 3 (2.6%)                                        | 1.000  |
| <b>Outcomes</b>                         |                   |                                                |                                                 |        |
|                                         | <b>N=205</b>      | <b>N=90</b>                                    | <b>N=114</b>                                    |        |
| Invasive mechanical ventilation, n (%)  | 151 (74.4%)       | 62 (69.7%)                                     | 89 (78.1%)                                      | 0.173  |
| ARDS, n (%)                             | 175 (86.6%)       | 75 (85.2%)                                     | 100 (87.7%)                                     | 0.606  |
| Septic shock, n (%)                     | 82 (41.4%)        | 36 (41.4%)                                     | 46 (41.4%)                                      | 0.993  |
| Multiorgan failure (%)                  | 98 (49.2%)        | 42 (48.3%)                                     | 56 (50.0%)                                      | 0.809  |
| Death, n (%)                            | 125 (61.0%)       | 49 (54.4%)                                     | 76 (66.1%)                                      | 0.090  |

<sup>a</sup>Mainly mycophenolate.

<sup>b</sup>Gancyclovir (n=2), ribavirine (n=1), raltegravir (n=1).

<sup>c</sup>Includes corticosteroid boluses, initiation of low-to-moderate doses or increase of baseline dose.

ARDS: Acute Respiratory Distress Syndrome, ICU: Intensive Care Unit, IQR: Interquartile range, mTOR: mammalian target of rapamycin.

**Table S4.** Univariate and multivariate (logistic regression) models of factors associated with mortality in the ICU cohort of solid organ transplant recipients diagnosed with COVID-19 during 2020 in Spain. (N=205).

|                                       |                                   | Univariate  |             |       | Multivariate |                          |  |
|---------------------------------------|-----------------------------------|-------------|-------------|-------|--------------|--------------------------|--|
|                                       |                                   | Total cases | n %         | p     | p            | OR (IC 95%)              |  |
| <b>Type of transplant</b>             | Kidney                            | 145         | 85 (58.6%)  | 0.030 | 0.254        | 1.76 (0.66-4.64)         |  |
|                                       | Liver                             | 20          | 10 (50.0%)  |       | Ref.         |                          |  |
|                                       | Heart                             | 15          | 12 (80.0%)  |       | 0.081        | 4.03 (0.84-19.35)        |  |
|                                       | Lung                              | 23          | 18 (78.3%)  |       | <b>0.033</b> | <b>4.38 (1.12-17.09)</b> |  |
|                                       | Pancreas                          | 2           | 0 -         |       |              |                          |  |
| <b>Age at diagnosis</b>               | ≤60 years                         | 92          | 47 (51.1%)  | 0.009 | Ref.         |                          |  |
|                                       | >60 years                         | 113         | 78 (69.0%)  |       | <b>0.007</b> | <b>2.30 (1.25-4.22)</b>  |  |
| <b>Sex</b>                            | Male                              | 141         | 86 (61.0%)  | 0.994 |              |                          |  |
|                                       | Female                            | 64          | 39 (60.9%)  |       |              |                          |  |
| <b>Time since transplantation</b>     | ≤ 1 year                          | 44          | 32 (72.7%)  | 0.071 | 0.093        | 1.95 (0.89-4.29)         |  |
|                                       | > 1 year                          | 161         | 93 (57.8%)  |       | Ref.         |                          |  |
| <b>Type of infection</b>              | Community                         | 169         | 101 (59.8%) | 0.590 |              |                          |  |
|                                       | Hospital                          | 34          | 22 (64.7%)  |       |              |                          |  |
| <b>Period of diagnosis</b>            | First wave (before 13 July, 2020) | 90          | 49 (54.4%)  | 0.090 | 0.157        | 0.65 (0.35-1.18)         |  |
|                                       | Second wave (after 13 July, 2020) | 115         | 76 (66.1%)  |       | Ref.         |                          |  |
| <b>Baseline calcineurin inhibitor</b> | Yes                               | 194         | 117 (60.3%) | 0.534 |              |                          |  |
|                                       | No                                | 11          | 8 (72.7%)   |       |              |                          |  |
| <b>Baseline antimetabolite</b>        | Yes                               | 160         | 100 (62.5%) | 0.399 |              |                          |  |
|                                       | No                                | 45          | 25 (55.6%)  |       |              |                          |  |
| <b>Baseline mTOR inhibitor</b>        | Yes                               | 30          | 18 (60.0%)  | 0.906 |              |                          |  |
|                                       | No                                | 175         | 107 (61.1%) |       |              |                          |  |
